# Supplementary material
Source: Springer Nature journal article supplement (https://www.springermedizin.de/resource/supplementary/13063_2013_1330_MOESM1_ESM.pdf/9619840)
Supplement: MOESM1 [file 9619840]

Referred by Primary Healthcare Professional or Self-Referred

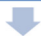

Identification of Eligible Participants

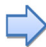

Ineligible = did not meet inclusion and exclusion

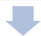

Consent and Randomisation

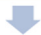

Baseline Assessment

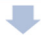

WEEK 1

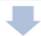

Completed Baseline Period

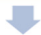

WEEKS 2-8

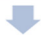

Completion of Follow up

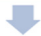

Follow up Assessments
